# Supplementary material for: Angelica gigas ameliorates the destruction of gingival tissues via inhibition of MMP-9 activity
Source: Royal Society of Chemistry journal article supplement (doi:10.1039/c7ra12531c), 2018-01-01

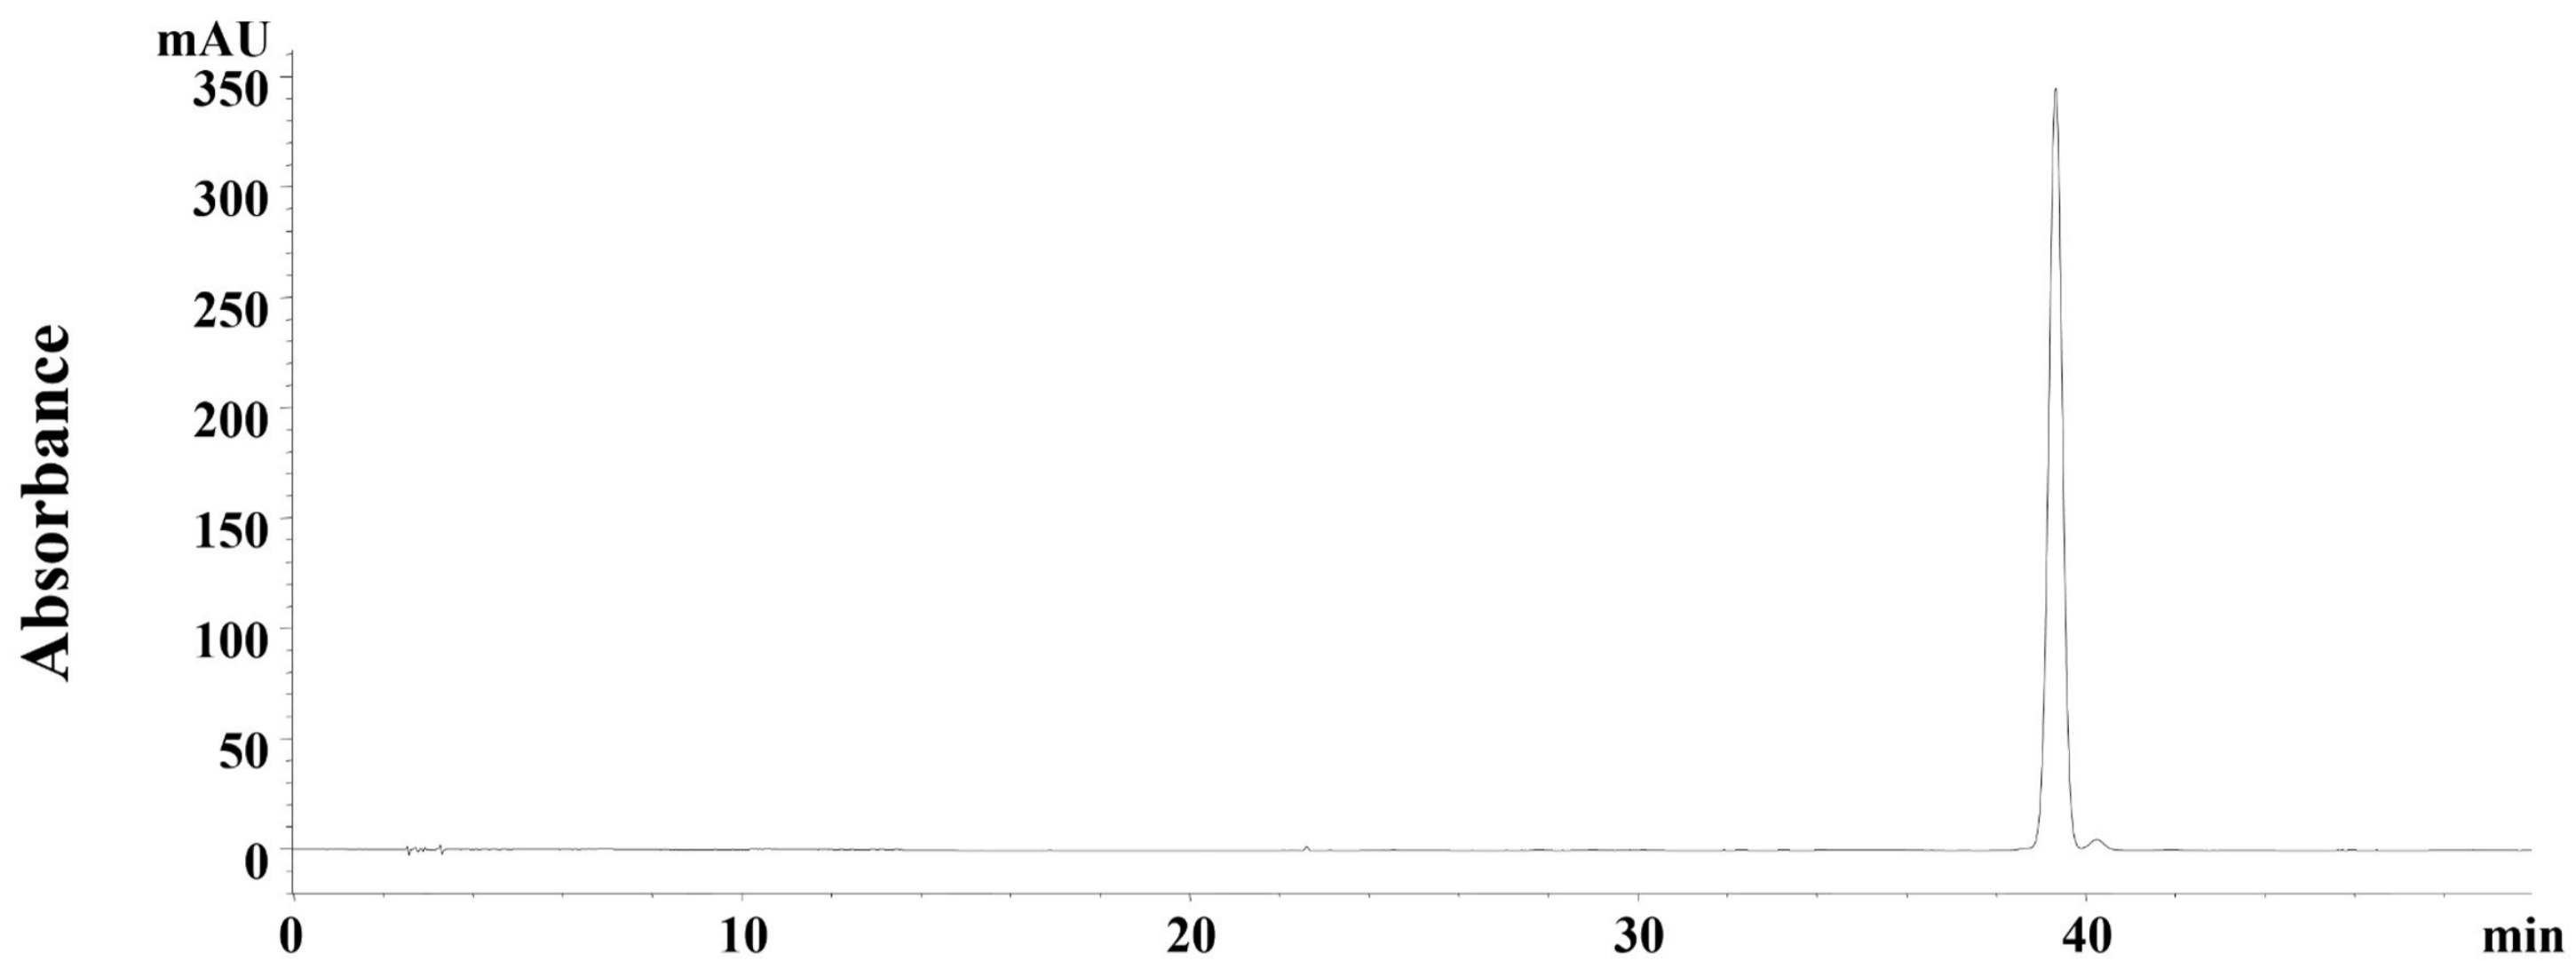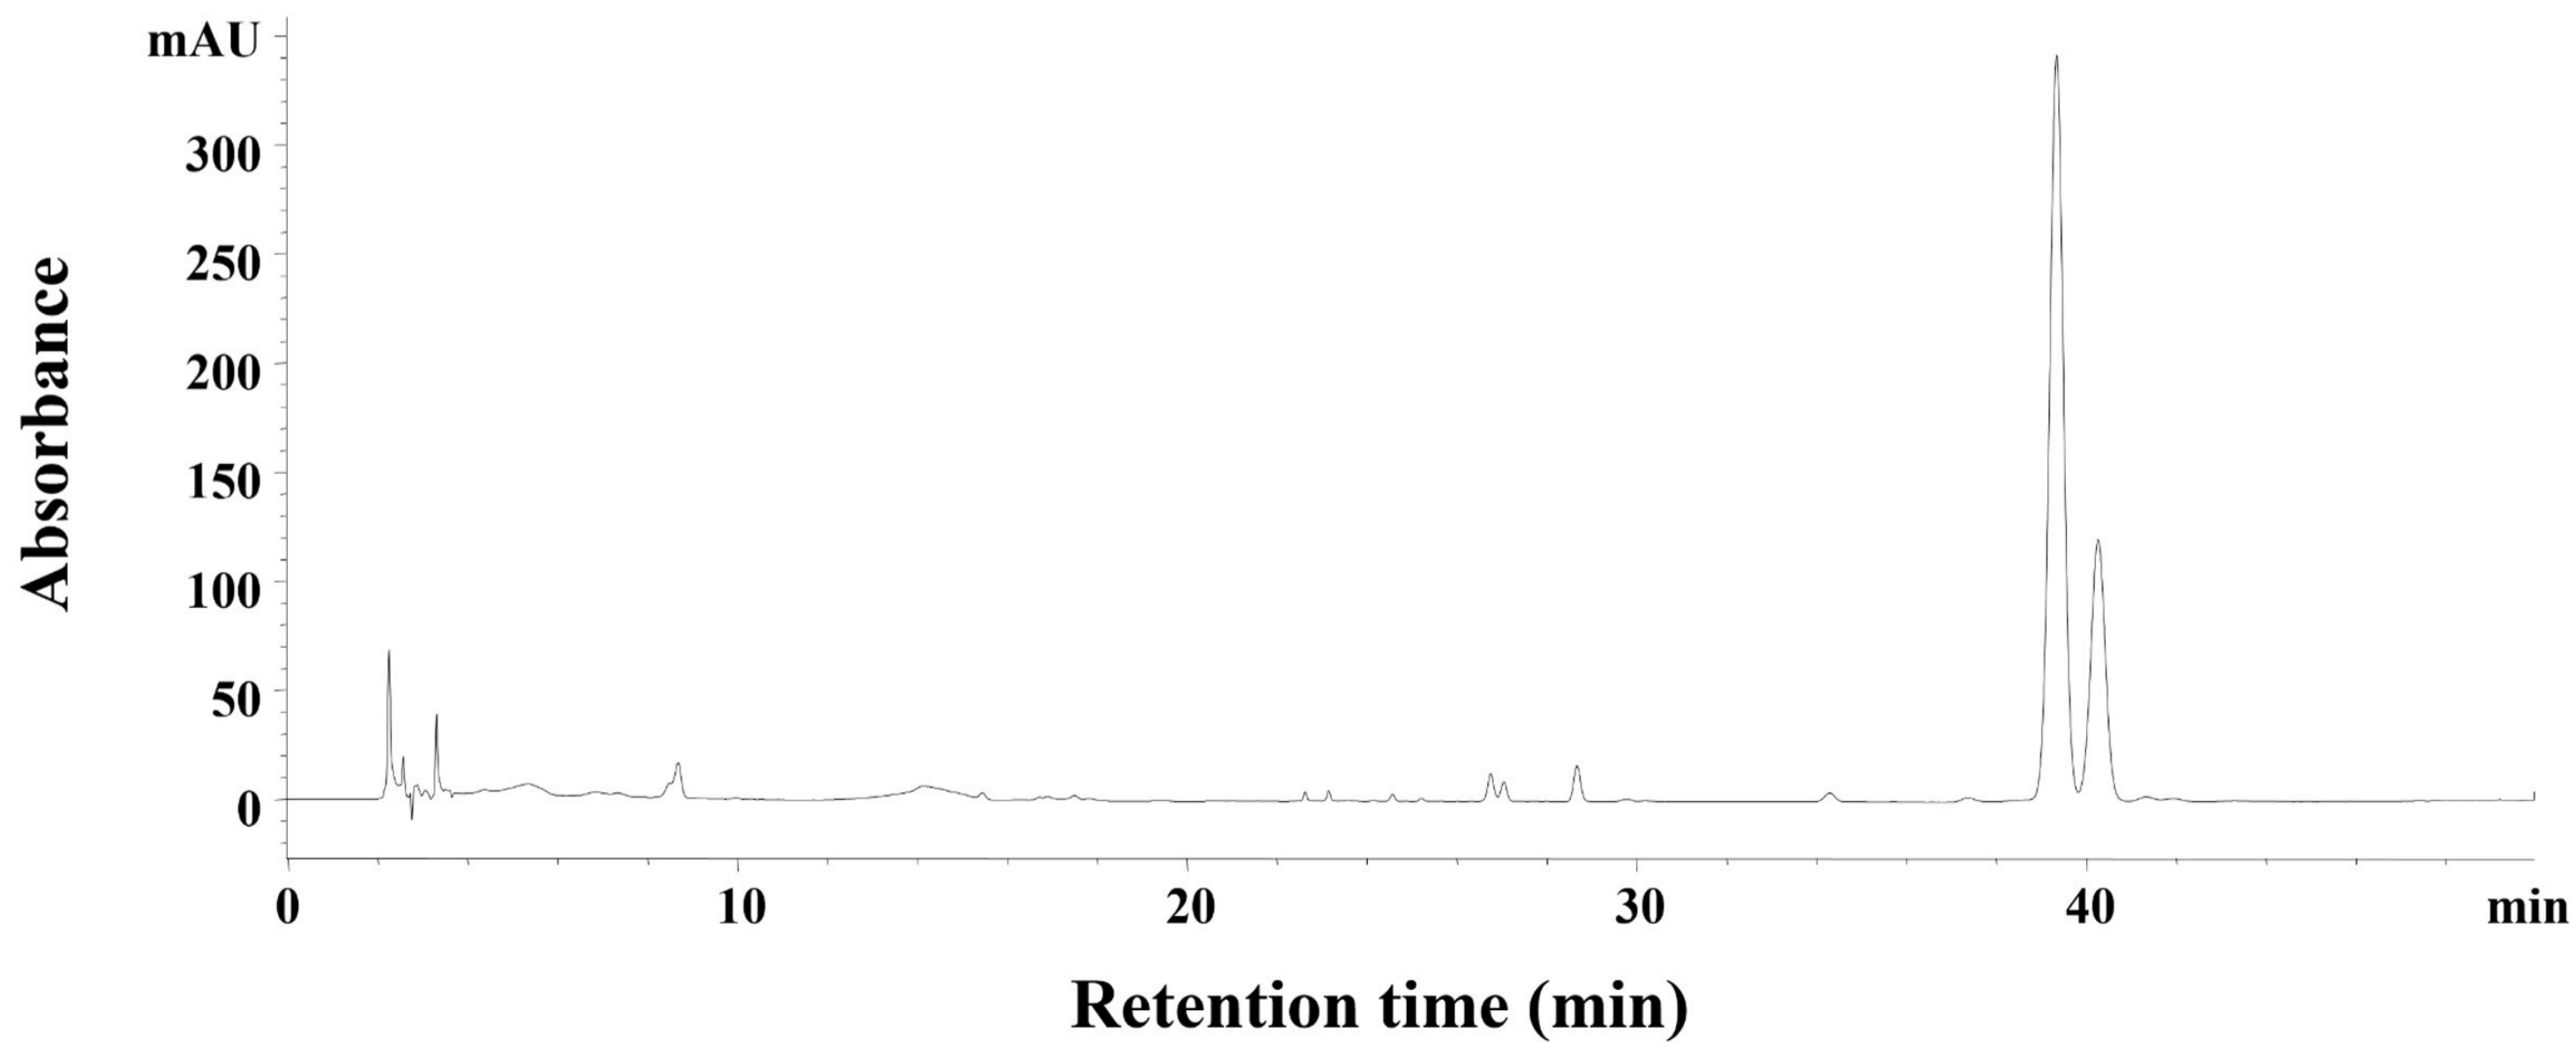

Supplement: c7ra12531c1.pdf [file c7ra12531c1.pdf]
